# Supplementary material
Source: PubMed Central journal article supplement (PMC3844871)
Supplement: NIHMS523959-supplement-02.pdf [file NIHMS523959-supplement-02.pdf]

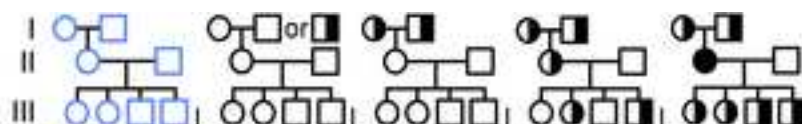

|                                                                 |                          |                    |                                 |                       |                       |                       |                       |
|-----------------------------------------------------------------|--------------------------|--------------------|---------------------------------|-----------------------|-----------------------|-----------------------|-----------------------|
| <b>Average No. of conceptuses/litter (No. of implantations)</b> |                          | 9.3±0.3<br>(93)    | 6.7±1.1<br>(47)                 | 8.0±0.5*<br>(56)      | 7.7±1.1<br>(54)       | 7.4±0.8*<br>(59)      |                       |
| <b>Normal stage</b>                                             |                          | 8.9±0.4<br>(95.7%) | 5.3±1.3 <sup>a</sup><br>(78.7%) | 2.7±1.2**<br>(33.9%)  | 3.3±1.2**<br>(42.6%)  | 3.4±0.9***<br>(45.8%) |                       |
| <b>Developmental delay</b>                                      | <b>Total</b>             | 0.0                | 0.1±0.1 <sup>b</sup><br>(2.1%)  | 2.4±0.5***<br>(30.4%) | 2.0±0.9***<br>(25.9%) | 1.9±0.7***<br>(25.4%) |                       |
|                                                                 | ≥E9.5-E10.0<br>(21-29 s) | 0.0                | 0.1±0.1<br>(2.1%)               | 2.3±0.6***<br>(29.1%) | 1.6±0.6*<br>(20.3%)   | 1.4±0.6***<br>(18.6%) |                       |
|                                                                 | ≥E8.5-E9.5<br>(8-20 s)   | 0.0                | 0.0                             | 0.1±0.1<br>(1.8%)     | 0.4±0.3<br>(5.6%)     | 0.5±0.5<br>(6.8%)     |                       |
|                                                                 | <E8.5<br>(<8 s)          | 0.0                | 0.0                             | 0.0                   | 0.0                   | 0.0                   |                       |
| <b>Severe Abnormalities</b>                                     | <b>Overall total</b>     |                    | 0.0                             | 0.3±0.2<br>(4.3%)     | 1.4±0.4***<br>(17.9%) | 0.9±0.3*<br>(11.1%)   | 1.3±0.4***<br>(16.9%) |
|                                                                 | <b>&gt;1 phenotype</b>   |                    | 0.0                             | 0.0 <sup>b</sup>      | 0.7±0.3**<br>(9.1%)   | 0.1±0.1<br>(1.9%)     | 0.1±0.1<br>(1.7%)     |
|                                                                 | <b>Placenta</b>          | Off-centered CA    | 0.0                             | 0.0                   | 0.7±0.3**<br>(9.1%)   | 0.1±0.1<br>(1.9%)     | 0.5±0.2*<br>(6.8%)    |
|                                                                 |                          | No CA              | 0.0                             | 0.0                   | 0.0                   | 0.0                   | 0.0                   |
|                                                                 |                          | <b>Total</b>       | 0.0                             | 0.0 <sup>b</sup>      | 0.7±0.3**<br>(9.1%)   | 0.1±0.1<br>(1.9%)     | 0.5±0.2*<br>(6.8%)    |
|                                                                 | <b>Heart</b>             | Pericardial edema  | 0.0                             | 0.0                   | 0.1±0.1<br>(1.7%)     | 0.0                   | 0.0                   |
|                                                                 |                          | Reversed looping   | 0.0                             | 0.0                   | 0.0                   | 0.0                   | 0.0                   |
|                                                                 |                          | Enlarged heart     | 0.0                             | 0.0                   | 0.4±0.2<br>(5.4%)     | 0.1±0.1<br>(1.9%)     | 0.1±0.1<br>(1.7%)     |
|                                                                 |                          | <b>Total</b>       | 0.0                             | 0.0 <sup>b</sup>      | 0.6±0.2**<br>(7.2%)   | 0.1±0.1<br>(1.8%)     | 0.1±0.1<br>(1.7%)     |
|                                                                 | <b>Neural tube</b>       | Cranial NTD        | 0.0                             | 0.1±0.1<br>(2.1%)     | 0.6±0.2*<br>(7.3%)    | 0.2±0.1<br>(3.7%)     | 0.5±0.4<br>(6.8%)     |
|                                                                 |                          | Spinal NTD         | 0.0                             | 0.0                   | 0.0                   | 0.0                   | 0.0                   |
|                                                                 |                          | <b>Total</b>       | 0.0                             | 0.1±0.1<br>(2.1%)     | 0.6±0.2*<br>(7.3%)    | 0.2±0.1<br>(3.7%)     | 0.5±0.4<br>(6.8%)     |
|                                                                 | <b>Hemorrhages</b>       | Placenta           | 0.0                             | 0.1±0.1<br>(2.1%)     | 0.2±0.1<br>(1.8%)     | 0.2±0.2<br>(3.7%)     | 0.1±0.2<br>(3.4%)     |
|                                                                 |                          | Embryo             | 0.0                             | 0.0                   | 0.0                   | 0.2±0.2<br>(3.7%)     | 0.0                   |
|                                                                 |                          | <b>Total</b>       | 0.0                             | 0.1±0.1<br>(2.1%)     | 0.2±0.1<br>(1.8%)     | 0.3±0.3<br>(7.4%)     | 0.1±0.2<br>(3.4%)     |
|                                                                 | <b>Resorptions</b>       |                    | 0.4±0.2<br>(4.3%)               | 1.0±0.4<br>(14.9%)    | 1.4±0.4*<br>(17.9%)   | 1.6±0.5*<br>(20.4%)   | 0.9±0.4<br>(11.9%)    |

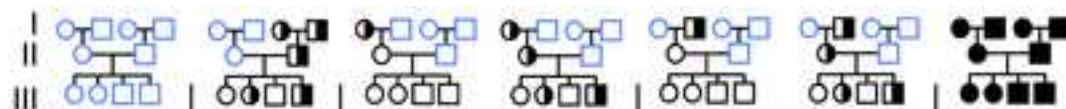

| No. of MGMs, MGFs or fathers        |                        | 3 <sup>a,b</sup>  | 3 <sup>c</sup>  | 7 <sup>a</sup>    | 7 <sup>a</sup>    | 3 <sup>b</sup>     | 4 <sup>b</sup>   | 7 <sup>a</sup> , 3 <sup>b</sup> |                  |
|-------------------------------------|------------------------|-------------------|-----------------|-------------------|-------------------|--------------------|------------------|---------------------------------|------------------|
| No. of litters (No. of conceptuses) |                        | 10 (93)           | 10 (94)         | 10 (83)           | 14 (129)          | 10 (89)            | 10 (87)          | 21 (176)                        |                  |
| Average conceptuses/litter          |                        | 9.3±0.3           | 9.4±0.3         | 8.2±0.9           | 9.2±0.4           | 8.9±0.5            | 8.7±0.3          | 8.4±0.6                         |                  |
| Developmental delay                 | ≥E9.5-E10.0 (21-29 s)  | 0.0               | 0.0             | 0.7±0.3* (8.5%)   | 0.4±0.2* (4.7%)   | 0.1±0.1 (1.1%)     | 0.1±0.1 (1.1%)   | 1.3±0.4* (15.3%)                |                  |
|                                     | ≥E8.5-E9.5 (8-20 s)    | 0.0               | 0.0             | 0.0               | 0.2±0.1 (2.3%)    | 0.5±0.3 (5.6%)     | 0.9±0.4* (10.3%) | 0.4±0.2 (5.1%)                  |                  |
|                                     | <E8.5 (<8 s)           | 0.0               | 0.0             | 0.0               | 0.0               | 0.0                | 0.1±0.1 (1.1%)   | 0.1±0.1 (1.7%)                  |                  |
|                                     | <b>Total</b>           | 0.0               | 0.0             | 0.7±0.3* (8.5%)   | 0.6±0.3* (7.0%)   | 0.6±0.3 (6.7%)     | 1.1±0.5* (12.6%) | 1.9±0.5** (22.2%)               |                  |
| Severe Abnormalities                | <b>Overall total</b>   | 0.0               | 0.1±0.1 (1.1%)  | 1.4±0.3** (17.1%) | 1.1±0.3** (11.6%) | 1.0±0.2*** (12.4%) | 0.8±0.3* (9.2%)  | 1.3±0.2** (15.9%)               |                  |
|                                     | <b>&gt;1 phenotype</b> | 0.0               | 0.0             | 0.5±0.2* (6.0%)   | 0.4±0.1* (3.9%)   | 0.4±0.2* (4.5%)    | 0.6±0.2* (6.9%)  | 0.6±0.2* (6.3%)                 |                  |
|                                     | Placenta               | Off-centered CA   | 0.0             | 0.1±0.1 (1.1%)    | 0.5±0.2* (7.3%)   | 0.4±0.2* (3.9%)    | 0.2±0.1 (2.2%)   | 0.2±0.1 (2.3%)                  | 0.6±0.1** (7.4%) |
|                                     |                        | No CA             | 0.0             | 0.0               | 0.3±0.2 (2.4%)    | 0.1±0.1 (0.8%)     | 0.0              | 0.2±0.1 (2.3%)                  | 0.1±0.1 (0.6%)   |
|                                     |                        | <b>Total</b>      | 0.0             | 0.1±0.1 (1.1%)    | 0.8±0.3* (9.8%)   | 0.4±0.1* (4.7%)    | 0.2±0.1 (2.2%)   | 0.4±0.2* (4.6%)                 | 0.7±0.2** (8.0%) |
|                                     | Heart                  | Pericardial edema | 0.0             | 0.0               | 0.3±0.2* (2.4%)   | 0.0*               | 0.3±0.2* (3.4%)  | 0.2±0.1 (2.3%)                  | 0.4±0.1 (4.5%)   |
|                                     |                        | Reversed looping  | 0.0             | 0.0               | 0.0               | 0.1±0.1 (0.8%)     | 0.0              | 0.0                             | 0.0              |
|                                     |                        | Enlarged heart    | 0.0             | 0.0               | 0.2±0.1 (3.7%)    | 0.2±0.1 (2.3%)     | 0.2±0.1 (2.2%)   | 0.0                             | 0.2±0.1 (2.8%)   |
|                                     |                        | <b>Total</b>      | 0.0             | 0.0               | 0.4±0.2* (6.1%)   | 0.3±0.1 (3.1%)     | 0.4±0.2* (5.7%)  | 0.2±0.1 (2.3%)                  | 0.6±0.2* (7.4%)  |
|                                     | Neural tube            | Cranial NTD       | 0.0             | 0.0               | 0.1±0.1 (1.2%)    | 0.1±0.1 (0.8%)     | 0.1±0.1 (1.1%)   | 0.4±0.2* (4.6%)                 | 0.2±0.1 (2.3%)   |
|                                     |                        | Spinal NTD        | 0.0             | 0.0               | 0.2±0.1 (2.4%)    | 0.0                | 0.1±0.1 (1.1%)   | 0.0                             | 0.0              |
|                                     |                        | <b>Total</b>      | 0.0             | 0.0               | 0.3±0.2 (3.6%)    | 0.1±0.1 (0.8%)     | 0.2±0.1 (2.2%)   | 0.4±0.2* (4.6%)                 | 0.2±0.1 (2.3%)   |
|                                     | Hemorrhages            | Placenta          | 0.0             | 0.0               | 0.3±0.2 (3.6%)    | 0.3±0.1 (2.3%)     | 0.1±0.1 (1.1%)   | 0.3±0.2 (3.4%)                  | 0.2±0.1 (2.3%)   |
|                                     |                        | Embryo            | 0.0             | 0.0               | 0.0               | 0.1±0.1 (1.6%)     | 0.3±0.2 (3.4%)   | 0.1±0.1 (1.1%)                  | 0.2±0.1 (2.8%)   |
|                                     |                        | <b>Total</b>      | 0.0             | 0.0               | 0.3±0.2 (3.6%)    | 0.4±0.1* (3.9%)    | 0.4±0.2* (4.5%)  | 0.4±0.2* (4.5%)                 | 0.4±0.1 (5.1%)   |
| <b>Twins/Triplets</b>               | 0.0                    | 0.0               | 0.1±0.1 (1.2%)  | 0.1±0.1 (1.6%)    | 0.2±0.1 (2.2%)    | 0.1±0.1 (1.1%)     | 0.1±0.1 (0.6%)   |                                 |                  |
| <b>Resorptions</b>                  | 0.4±0.2 (4.3%)         | 0.4±0.2 (4.3%)    | 0.9±0.4 (11.0%) | 0.6±0.1 (6.2%)    | 0.3±0.2 (3.4%)    | 0.7±0.3 (8.0%)     | 1.2±0.4 (14.2%)  |                                 |                  |



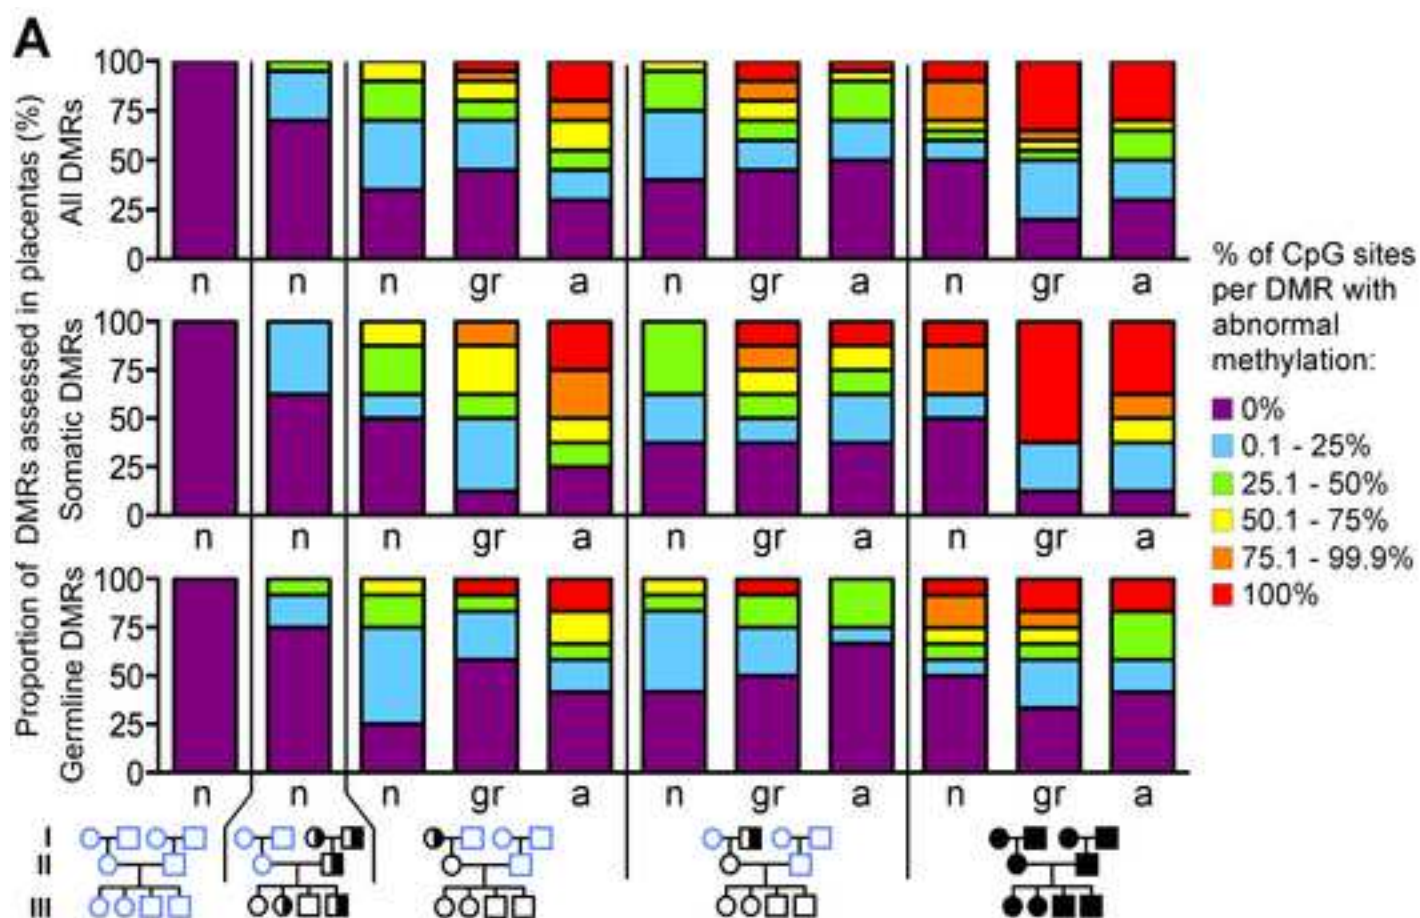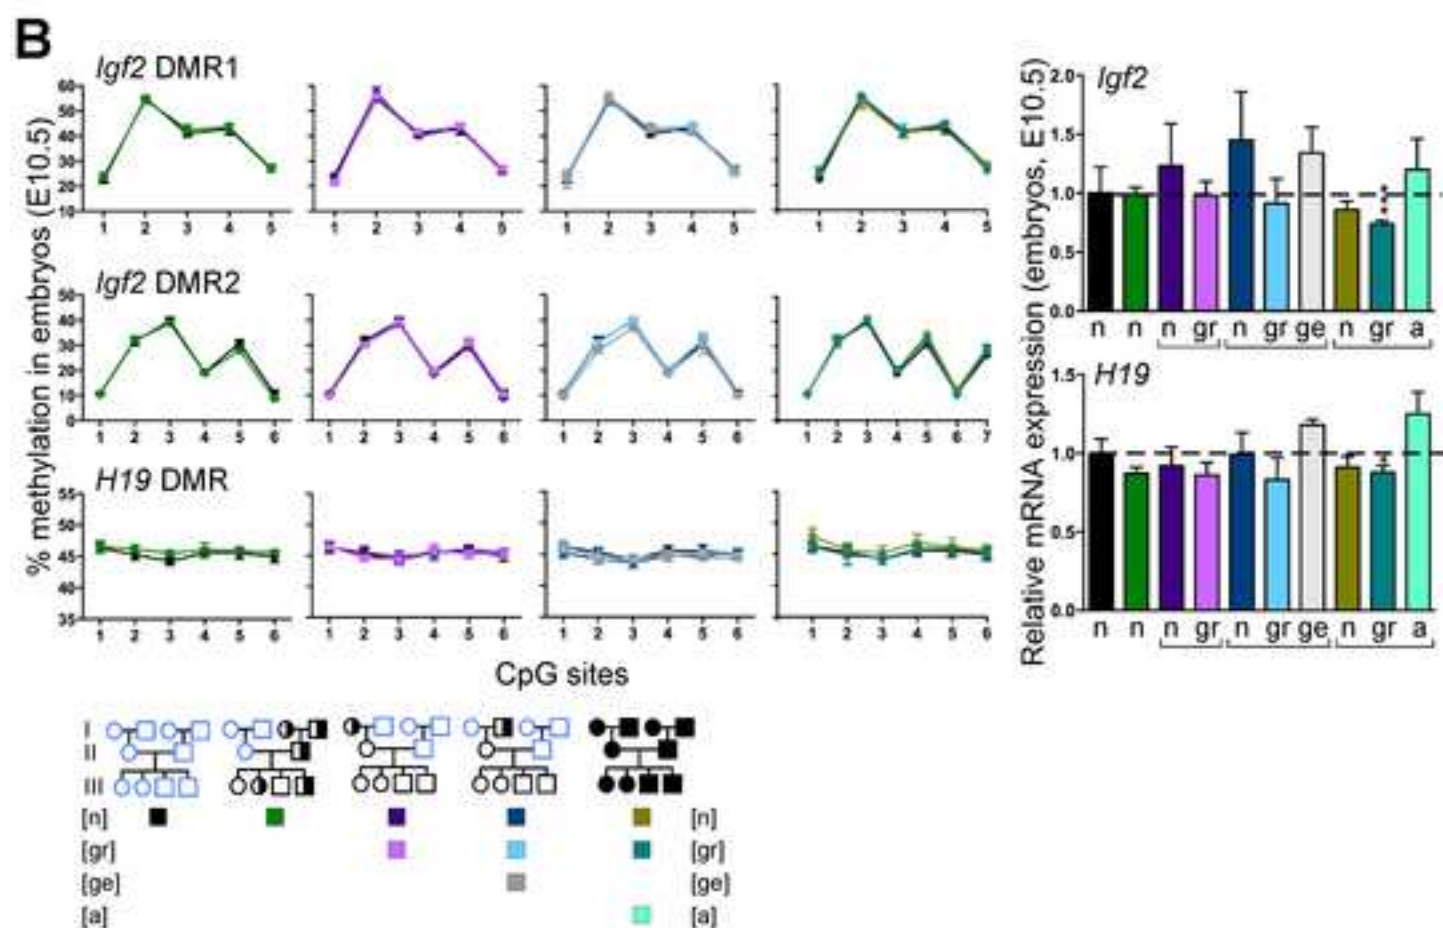

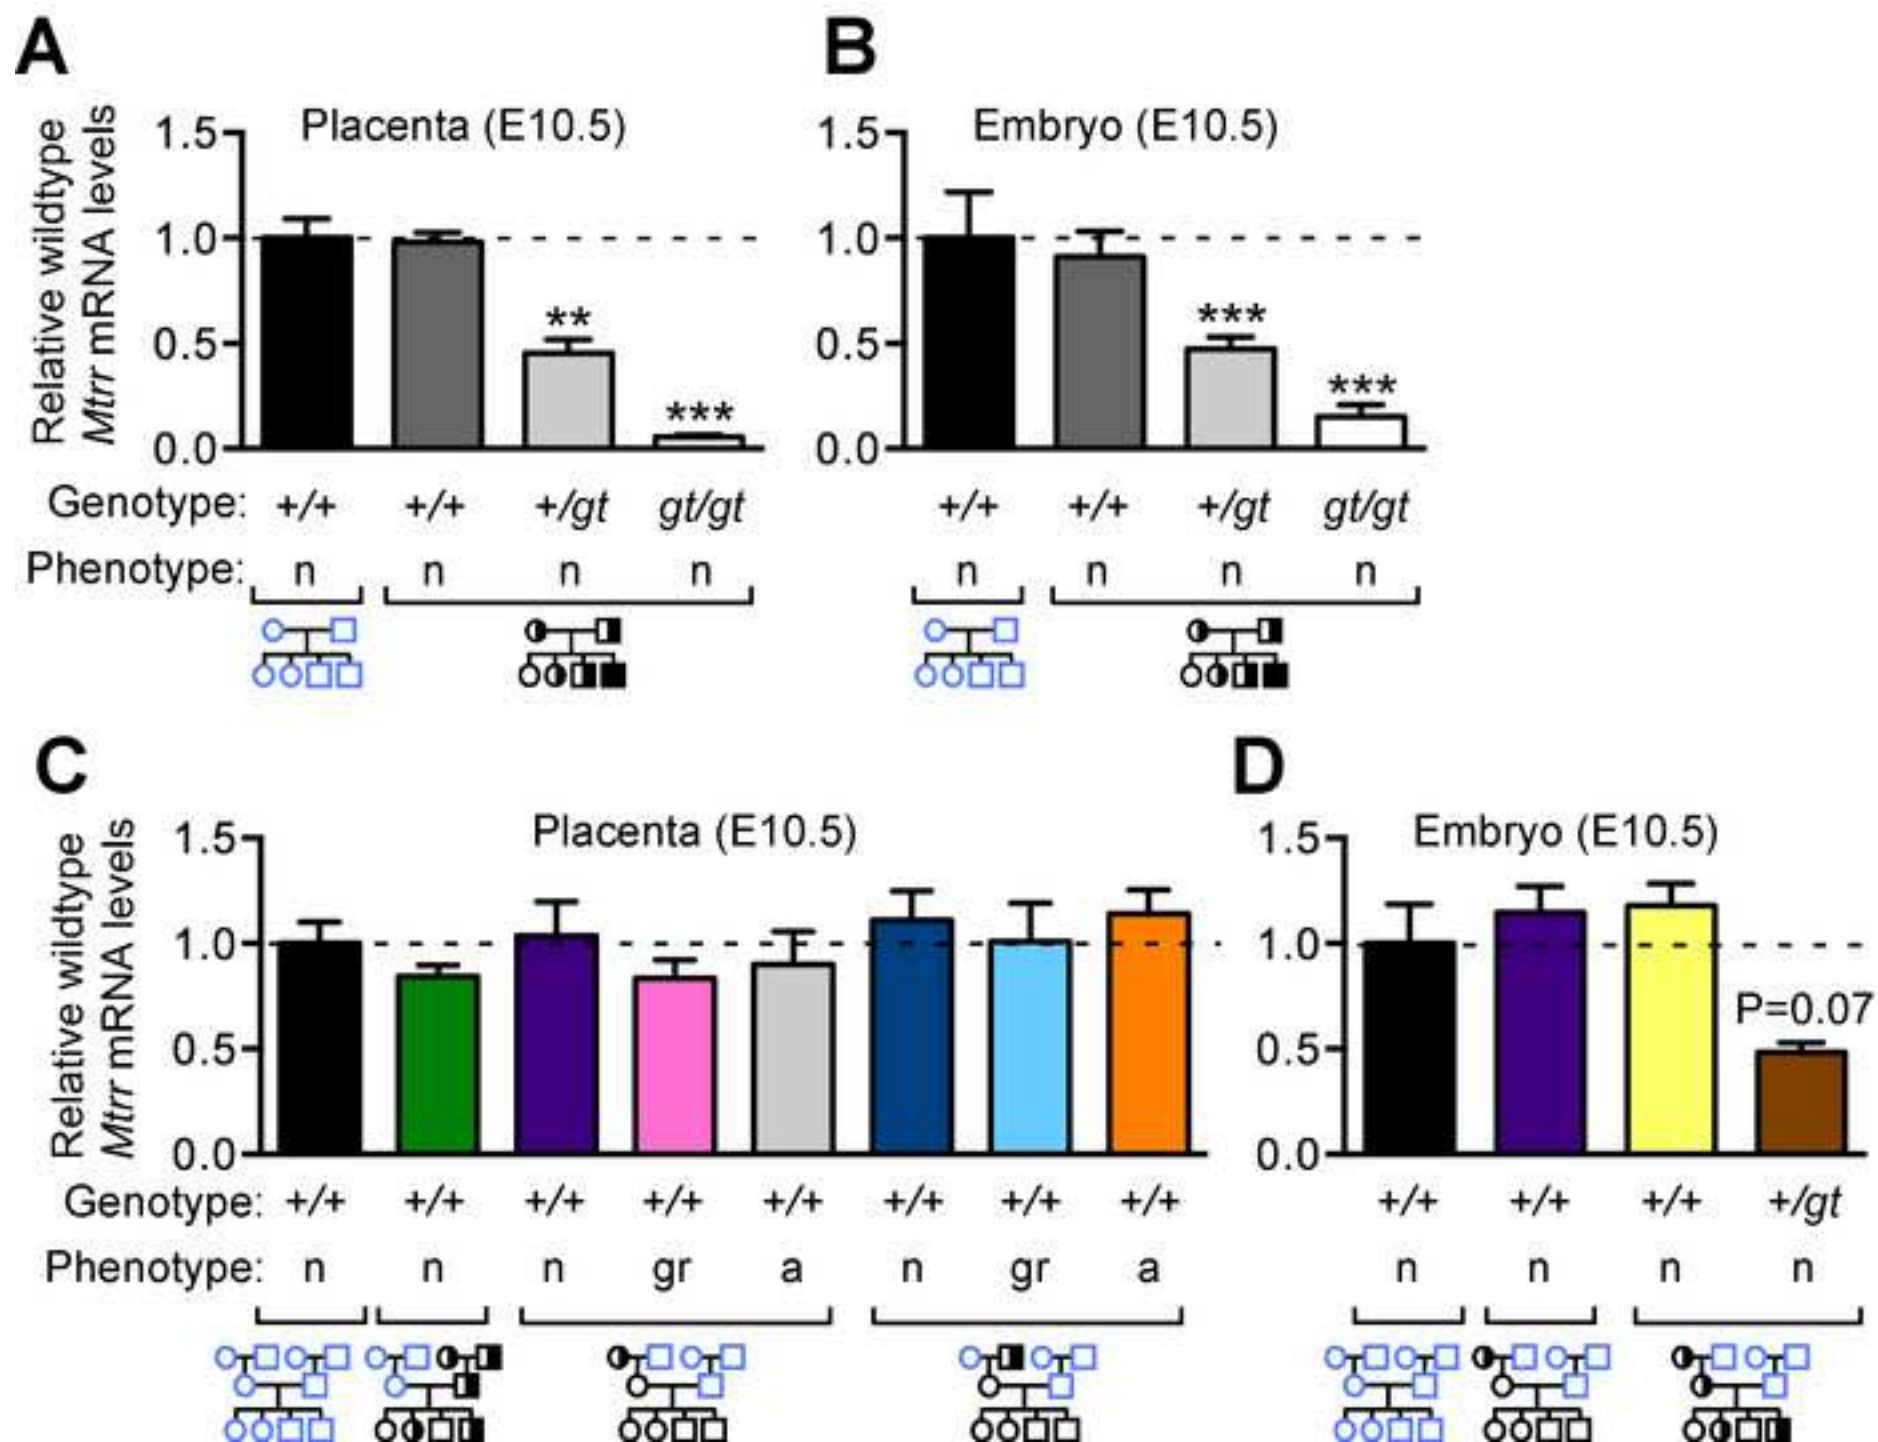

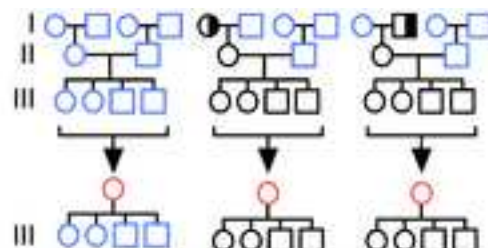

|                                                             |                              |                                |                             |                                        |                                         |                            |
|-------------------------------------------------------------|------------------------------|--------------------------------|-----------------------------|----------------------------------------|-----------------------------------------|----------------------------|
| <b>Average No. of embryos transferred/litter [E3.5] (N)</b> |                              | <b>9.1 ± 0.3</b><br>(91)       | <b>7.6 ± 0.4**</b><br>(53)  | <b>8.9 ± 0.5</b><br>(89)               |                                         |                            |
| <b>Average No. of conceptuses /litter [E10.5] (N)</b>       |                              | <b>5.4 ± 0.5</b><br>(43)       | <b>6.0 ± 1.0</b><br>(36)    | <b>6.7 ± 0.5*</b><br>(60)              |                                         |                            |
| <b>Developmental delay</b>                                  | <b>≥E9.5-E10.0 (21-29 s)</b> | <b>0.5 ± 0.5</b><br>(9.3%)     | <b>0.0</b>                  | <b>0.0</b>                             |                                         |                            |
|                                                             | <b>≥E8.5-E9.5 (8-20 s)</b>   | <b>0.0</b>                     | <b>0.0</b>                  | <b>0.0</b>                             |                                         |                            |
|                                                             | <b>&lt;E8.5 (&lt;8 s)</b>    | <b>0.0</b>                     | <b>0.0</b>                  | <b>0.0</b>                             |                                         |                            |
|                                                             | <b>Total</b>                 | <b>0.5 ± 0.5</b><br>(9.3%)     | <b>0.0</b>                  | <b>0.0</b>                             |                                         |                            |
| <b>Severe Abnormalities</b>                                 | <b>Overall total</b>         |                                | <b>0.0</b>                  | <b>0.5 ± 0.2<sup>a</sup></b><br>(8.3%) | <b>1.0 ± 0.3**</b><br>(15.0%)           |                            |
|                                                             | <b>&gt;1 phenotype</b>       |                                | <b>0.0</b>                  | <b>0.3 ± 0.2*</b><br>(5.6%)            | <b>0.6 ± 0.3<sup>a</sup></b><br>(10.0%) |                            |
|                                                             | <b>Placenta</b>              | Off-centered/no CA             |                             | <b>0.0</b>                             | <b>0.3 ± 0.2</b><br>(5.6%)              | <b>0.2 ± 0.1</b><br>(3.3%) |
|                                                             |                              | Necrotic placenta              |                             | <b>0.0</b>                             | <b>0.0</b>                              | <b>0.2 ± 0.1</b><br>(3.3%) |
|                                                             |                              | <b>Total</b>                   |                             | <b>0.0</b>                             | <b>0.3 ± 0.2</b><br>(5.6%)              | <b>0.4 ± 0.2</b><br>(6.6%) |
|                                                             | <b>Heart</b>                 | Pericardial edema              |                             | <b>0.0</b>                             | <b>0.0</b>                              | <b>0.2 ± 0.1</b><br>(3.3%) |
|                                                             |                              | Reversed looping               |                             | <b>0.0</b>                             | <b>0.0</b>                              | <b>0.0</b>                 |
|                                                             |                              | Enlarged or abnormal structure |                             | <b>0.0</b>                             | <b>0.3 ± 0.2</b><br>(5.6%)              | <b>0.3 ± 0.2</b><br>(5.0%) |
|                                                             |                              | <b>Total</b>                   |                             | <b>0.0</b>                             | <b>0.3 ± 0.2</b><br>(5.6%)              | <b>0.6 ± 0.3</b><br>(8.3%) |
|                                                             | <b>Neural tube</b>           | Cranial NTD                    |                             | <b>0.0</b>                             | <b>0.0</b>                              | <b>0.0</b>                 |
|                                                             |                              | Spinal NTD                     |                             | <b>0.0</b>                             | <b>0.0</b>                              | <b>0.1 ± 0.1</b><br>(1.7%) |
|                                                             |                              | <b>Total</b>                   |                             | <b>0.0</b>                             | <b>0.0</b>                              | <b>0.1 ± 0.1</b><br>(1.7%) |
|                                                             | <b>Hemorrhages</b>           | Placenta                       |                             | <b>0.0</b>                             | <b>0.2 ± 0.2</b><br>(2.8%)              | <b>0.3 ± 0.2</b><br>(5.0%) |
|                                                             |                              | Embryo                         |                             | <b>0.0</b>                             | <b>0.0</b>                              | <b>0.1 ± 0.1</b><br>(1.7%) |
|                                                             |                              | <b>Total</b>                   |                             | <b>0.0</b>                             | <b>0.2 ± 0.2</b><br>(2.8%)              | <b>0.5 ± 0.3</b><br>(6.7%) |
| Reversed body looping                                       |                              | <b>0.0</b>                     | <b>0.2 ± 0.2</b><br>(2.8%)  | <b>0.2 ± 0.1</b><br>(3.3%)             |                                         |                            |
| Twins/Triplets                                              |                              | <b>0.0</b>                     | <b>0.2 ± 0.2</b><br>(2.8%)  | <b>0.0</b>                             |                                         |                            |
| <b>Resorptions</b>                                          |                              | <b>1.1 ± 0.6</b><br>(20.9%)    | <b>0.7 ± 0.5</b><br>(11.1%) | <b>0.1 ± 0.1*</b><br>(1.7%)            |                                         |                            |



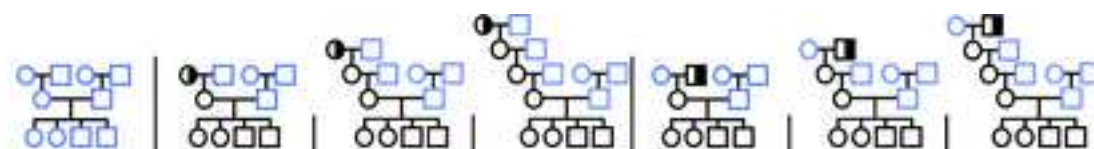

Generation analyzed: III III IV V III IV V

| No. of MGMs or MGFs                 |                   | 3                  | 7                    | 3                  | 2                    | 3                     | 3                  | 2                 |                   |
|-------------------------------------|-------------------|--------------------|----------------------|--------------------|----------------------|-----------------------|--------------------|-------------------|-------------------|
| No. of litters (No. of conceptuses) |                   | 10 (93)            | 10 (83)              | 10 (91)            | 10 (99)              | 10 (89)               | 13 (111)           | 9 (86)            |                   |
| Average conceptuses/litter          |                   | 9.3±0.3            | 8.3±0.9              | 9.1±0.4            | 9.9±0.3              | 8.9±0.5               | 8.5±0.3            | 9.6±0.4           |                   |
| Severe Abnormalities                | Overall total     | 0.0                | 1.4±0.3**<br>(17.1%) | 0.5±0.2*<br>(5.5%) | 1.0±0.4**<br>(10.1%) | 1.0±0.2***<br>(12.4%) | 0.4±0.1*<br>(4.5%) | 0.2±0.1<br>(2.3%) |                   |
|                                     | >1 phenotype      | 0.0                | 0.5±0.2*<br>(6.0%)   | 0.4±0.2<br>(4.4%)  | 0.8±0.2*<br>(8.1%)   | 0.4±0.2*<br>(4.5%)    | 0.3±0.1<br>(3.6%)  | 0.2±0.1<br>(2.3%) |                   |
|                                     | Placenta          | Off-centered CA    | 0.0                  | 0.5±0.2*<br>(7.3%) | 0.5±0.2*<br>(5.5%)   | 0.6±0.2*<br>(6.1%)    | 0.2±0.1<br>(2.3%)  | 0.2±0.1<br>(1.8%) | 0.1±0.1<br>(1.2%) |
|                                     |                   | No CA              | 0.0                  | 0.3±0.2<br>(2.4%)  | 0.0                  | 0.0                   | 0.0                | 0.1±0.1<br>(0.1%) | 0.0               |
|                                     |                   | Total              | 0.0                  | 0.8±0.3*<br>(9.8%) | 0.5±0.2*<br>(5.5%)   | 0.6±0.2*<br>(6.1%)    | 0.2±0.1<br>(2.3%)  | 0.2±0.1<br>(1.9%) | 0.1±0.1<br>(1.2%) |
|                                     | Heart             | Pericardial edema  | 0.0                  | 0.3±0.2*<br>(2.4%) | 0.3±0.2<br>(3.3%)    | 0.7±0.2*<br>(7.1%)    | 0.3±0.2*<br>(3.4%) | 0.3±0.2<br>(3.6%) | 0.2±0.1<br>(2.3%) |
|                                     |                   | Reversed looping   | 0.0                  | 0.0                | 0.0                  | 0.2±0.1<br>(2.0%)     | 0.0                | 0.0               | 0.0               |
|                                     |                   | Enlarged heart     | 0.0                  | 0.2±0.1<br>(3.7%)  | 0.1±0.1<br>(1.1%)    | 0.0                   | 0.2±0.1<br>(2.3%)  | 0.2±0.2<br>(2.7%) | 0.0               |
|                                     |                   | Total              | 0.0                  | 0.4±0.2*<br>(6.1%) | 0.4±0.2<br>(4.4%)    | 0.9±0.2*<br>(9.1%)    | 0.4±0.2*<br>(5.7%) | 0.5±0.3<br>(6.3%) | 0.2±0.1<br>(2.3%) |
|                                     | Neural tube       | Cranial NTD        | 0.0                  | 0.1±0.1<br>(1.2%)  | 0.0                  | 0.0                   | 0.1±0.1<br>(1.1%)  | 0.1±0.1<br>(0.1%) | 0.0               |
|                                     |                   | Spinal NTD         | 0.0                  | 0.2±0.1<br>(2.4%)  | 0.0                  | 0.0                   | 0.1±0.1<br>(1.1%)  | 0.0               | 0.0               |
|                                     |                   | Total              | 0.0                  | 0.3±0.2<br>(3.6%)  | 0.0                  | 0.0                   | 0.2±0.1<br>(2.2%)  | 0.1±0.1<br>(0.1%) | 0.0               |
|                                     | Hemorrhages       | Placenta           | 0.0                  | 0.3±0.2<br>(3.6%)  | 0.1±0.1<br>(1.1%)    | 0.3±0.2<br>(3.0%)     | 0.1±0.1<br>(1.1%)  | 0.1±0.1<br>(0.1%) | 0.1±0.1<br>(1.2%) |
|                                     |                   | Embryo             | 0.0                  | 0.0                | 0.0                  | 0.0                   | 0.3±0.2<br>(3.4%)  | 0.0               | 0.0               |
|                                     |                   | Total              | 0.0                  | 0.3±0.2<br>(3.6%)  | 0.1±0.1<br>(1.1%)    | 0.3±0.2<br>(3.0%)     | 0.4±0.2*<br>(4.5%) | 0.1±0.1<br>(0.1%) | 0.1±0.1<br>(1.2%) |
| Twins/Triples                       | 0.0               | 0.1±0.1<br>(1.2%)  | 0.0                  | 0.0                | 0.2±0.1<br>(2.2%)    | 0.1±0.1<br>(0.1%)     | 0.1±0.1<br>(1.2%)  |                   |                   |
| Resorptions                         | 0.4±0.2<br>(4.3%) | 0.9±0.4<br>(11.0%) | 0.5±0.2<br>(5.5%)    | 0.2±0.1<br>(2.0%)  | 0.3±0.2<br>(3.4%)    | 0.6±0.1<br>(7.2%)     | 0.0                |                   |                   |
